# Supplementary material for: Sustained elevated levels of C-reactive protein and ferritin in pulmonary tuberculosis patients remaining culture positive upon treatment initiation
Source: PubMed Central journal article supplement (PMC5383283; doi:10.1371/journal.pone.0175278), 2017-04-06
Supplement: pone.0175278.s001.pdf [file pone.0175278.s001.pdf]

| STUDY ID | GENDER | BMI          | AGE | HEMOGLOBIN   | Chronic Alcoholism | Illicit drug use | Smoking     | Ferritin Day 0 | CSP day 0 | positive BAAR day 60 | positive Culture day 60 |
|----------|--------|--------------|-----|--------------|--------------------|------------------|-------------|----------------|-----------|----------------------|-------------------------|
| 11       | Male   | 16.93941204  | 44  | 12.10        | yes                | no               | no          | 544.20         | 2.40      |                      |                         |
| 12       | Male   | 17.27        | 44  | 14.00        | yes                | no               | yes         | 142.00         | 0.20      |                      |                         |
| 14       | Male   | 17.42304267  | 29  | 6.80         | yes                | yes              | yes         | 373.10         | 12.20     |                      |                         |
| 15       | Male   | 14.94646044  | 31  | 12.10        | no                 | no               | yes         | 205.10         | 0.99      |                      |                         |
| 16       | Male   | 18.11        | 22  | 13.10        | no                 | no               | no          | 452.00         | 1.75      |                      |                         |
| 17       | Female | 19.64        | 23  | 13.00        | no                 | no               | no          | 133.50         | 2.43      |                      |                         |
| 18       | Female | 22.12041279  | 46  | 10.40        | no                 | no               | yes         | 733.00         | 10.70     |                      |                         |
| 19       | Female | 21.10501769  | 51  | 11.90        | yes                | no               | yes         | 160.00         | 4.70      |                      |                         |
| 20       | Male   | 14.60137824  | 50  | 9.70         | yes                | yes              | yes         | 337.80         | 7.13      |                      |                         |
| 21       | Male   | 14.67126028  | 43  | 11.60        | no                 | no               | yes         | 639.60         | 8.10      |                      |                         |
| 22       | Male   | 17.01        | 23  | 15.00        | no                 | no               | no          | 323.10         | 1.99      |                      |                         |
| 23       | Female | 20.52029186  | 24  | 10.80        | no                 | no               | yes         | 110.90         | 0.88      |                      |                         |
| 24       | Male   | 17.43757318  | 44  | 6.40         | yes                | yes              | yes         | 500.60         | 9.43      |                      |                         |
| 25       | Male   | 20.29800041  | 39  | 11.90        | yes                | no               | yes         | 138.00         | 2.78      |                      |                         |
| 26       | Female | 14.16279018  | 34  | 10.40        | no                 | no               | no          | 34.00          | 3.20      |                      |                         |
| 27       | Male   | 16.53        | 30  | 12.80        | yes                | yes              | yes         | 566.10         | 5.07      | positive             | positiva                |
| 29       | Male   | 14.56815877  | 38  | 9.40         | yes                | no               | yes         | 876.40         | 14.80     |                      |                         |
| 30       | Male   | 16.66461267  | 42  | 9.20         | yes                | no               | yes         | 702.00         | 5.07      | positive             | positiva                |
| 31       | Female | 16.43068684  | 40  | 10.40        | yes                | no               | yes         | 237.30         | 1.72      |                      |                         |
| 32       | Male   | 18.67        | 57  | 13.30        | yes                | no               | yes         | 1,059.90       | 16.30     |                      |                         |
| 33       | Male   | 20.42339211  | 50  | 9.70         | yes                | no               | no          | 302.00         | 8.46      |                      |                         |
| 34       | Male   | 18.45311597  | 31  | 11.40        | no                 | yes              | no          | 480.00         | 7.80      | positive             | positiva                |
| 35       | Male   | 19.72494835  | 37  | 12.10        | yes                | yes              | yes         | 168.00         | 2.79      |                      |                         |
| 36       | Female | 16.172       | 44  | 12.90        | no                 | no               | no          | 164.00         | 0.44      |                      |                         |
| 37       | Female | 22.81387935  | 32  | 12.20        | no                 | yes              | yes         | 91.00          | 2.29      |                      |                         |
| 38       | Male   | 12.36259147  | 41  | 8.50         | no                 | no               | no          | 203.10         | 6.70      |                      |                         |
| 39       | Female | 13.27329206  | 41  | 7.70         | yes                | no               | yes         | 113.80         | 6.92      |                      |                         |
| 40       | Male   | not measured | 25  | 10.60        | yes                | yes              | yes         | 905.80         | 16.00     | positive             | positiva                |
| 41       | Male   | 26.51709841  | 36  | 10.80        | yes                | no               | yes         | 742.10         | 3.50      |                      |                         |
| 42       | Male   | 24.35        | 50  | 13.80        | no                 | no               | no          | 467.00         | 1.68      |                      |                         |
| 43       | Male   | 20.64888599  | 23  | 11.50        | no                 | no               | no          | 112.20         | 1.86      |                      |                         |
| 44       | Male   | 17.88797062  | 20  | 12.20        | yes                | yes              | yes         | 626.40         | 4.59      |                      |                         |
| 45       | Male   | not measured | 24  | 6.50         | no                 | no               | no          | 1,025.00       | 4.24      |                      |                         |
| 46       | Male   | 22.35        | 22  | 13.80        | no                 | no               | no          | 419.80         | 1.04      |                      |                         |
| 47       | Male   | 20.12046648  | 52  | 7.70         | yes                | yes              | yes         | 835.50         | 0.73      |                      |                         |
| 48       | Female | 16.128       | 50  | 12.90        | no                 | no               | no          | 184.00         | 0.70      | positive             | positiva                |
| 51       | Male   | 21.5450908   | 64  | 12.40        | yes                | no               | yes         | 218.50         | 3.05      |                      |                         |
| 52       | Female | 16.44666581  | 47  | 8.90         | yes                | no               | no          | 242.00         | 1.17      |                      |                         |
| 53       | Male   | not measured | 23  | 9.60         | yes                | no               | yes         | 463.00         | 4.98      |                      |                         |
| 55       | Male   | 21.63        | 35  | 12.70        | no                 | no               | no          | 201.00         | 2.51      |                      |                         |
| 57       | Male   | 22.32142857  | 43  | 12.20        | yes                | no               | yes         | 76.00          | 0.50      |                      |                         |
| 58       | Male   | 16.20        | 54  | not measured | no                 | no               | no          | 185.00         | 7.68      |                      |                         |
| 59       | Male   | 15.96        | 43  | not measured | no                 | no               | yes         | 147.50         | 9.73      |                      | positiva                |
| 60       | Female | 13.24        | 41  | not measured | no                 | no               | yes         | 546.40         | 3.62      |                      |                         |
| 61       | Male   | 15.29611517  | 53  | 14.40        | yes                | no               | yes         | 410.10         | 2.56      | positive             | positiva                |
| 62       | Male   | 16.30        | 31  | 14.60        | yes                | no               | yes         | 479.80         | 7.46      |                      | positiva                |
| 63       | Male   | 19.61950039  | 31  | 11.50        | yes                | yes              | yes         | 405.20         | 2.99      |                      |                         |
| 64       | Female | 17.68978863  | 46  | 9.20         | no                 | no               | no          | 220.40         | 3.99      |                      |                         |
| 65       | Male   | 15.79896631  | 37  | 9.10         | yes                | no               | yes         | 236.30         | 4.92      |                      |                         |
| 67       | Male   | 21.62633844  | 30  | 8.50         | yes                | yes              | yes         | 1,500.00       | 2.32      |                      |                         |
| 69       | Male   | 15.44        | 54  | 12.90        | yes                | no               | yes         | 413.00         | 8.26      |                      |                         |
| 72       | Male   | 17.800662    | 39  | 9.20         | yes                | no               | yes         | 144.00         | 13.70     | positive             | positiva                |
| 73       | Male   | 17.5659642   | 26  | 7.90         | yes                | no               | no          | 327.80         | 9.15      |                      | positiva                |
| 74       | Male   | 19.99399676  | 27  | 11.30        | no                 | no               | no          | 853.30         | 4.02      |                      |                         |
| 75       | Female | 17.37396667  | 36  | 11.70        | yes                | no               | yes         | 439.10         | 4.93      |                      |                         |
| 76       | Female | 16.64932362  | 34  | 8.10         | no                 | no               | no          | 444.70         | 11.80     | positive             | positiva                |
| 79       | Male   | 22.01414144  | 53  | 12.40        | yes                | no               | yes         | 34.20          | 0.55      |                      | positiva                |
| 80       | Male   | 21.04053172  | 43  | 10.30        | yes                | no               | yes         | 206.30         | 8.42      |                      |                         |
| 82       | Male   | 18.9619742   | 48  | 12.30        | no                 | no               | no          | 317.25         | 6.63      |                      |                         |
| 83       | Male   | 18.79        | 25  | 12.50        | no                 | yes              | yes         | 77.60          | 1.04      |                      |                         |
| 86       | Male   | 16.97939184  | 45  | 6.80         | yes                | no               | yes         | 172.00         | 6.45      | positive             | positiva                |
| 88       | Male   | 16.09904819  | 50  | 9.30         | yes                | no               | yes         | 1,167.90       | 0.80      |                      |                         |
| 89       | Male   | 16.91723323  | 21  | 11.60        | no                 | yes              | yes         | 412.20         | 4.63      |                      |                         |
| 90       | Female | 15.76056613  | 33  | 10.60        | no                 | no               | no          | 449.00         | 1.82      |                      |                         |
| 91       | Male   | 16.97959184  | 34  | 10.50        | no                 | no               | no          | 596.00         | 4.19      |                      |                         |
| 92       | Female | not measured | 42  | 12.90        | no                 | no               | yes         | 577.00         | 12.20     |                      |                         |
| 93       | Male   | 18.17        | 44  | 13.60        | no                 | no               | no          | 488.00         | 18.40     |                      |                         |
| 94       | Male   | not measured | 49  | 8.70         | no                 | no               | no          | 644.00         | 11.70     |                      |                         |
| 95       | Male   | 21.38        | 45  | 10.90        | yes                | no               | yes         | 488.00         | 0.91      | positive             | positiva                |
| 96       | Female | 15.61473715  | 30  | 10.60        | no                 | no               | no          | 57.00          | 4.92      |                      |                         |
| 97       | Female | 15.20381328  | 30  | 6.20         | yes                | yes              | yes         | 341.00         | 4.86      |                      |                         |
| 98       | Male   | 15.625       | 43  | 8.70         | yes                | no               | no          | 439.00         | 3.08      |                      |                         |
| 99       | Male   | 18.81043813  | 51  | 8.90         | yes                | no               | yes         | 499.00         | 1.80      |                      |                         |
| 100      | Male   | 22.72        | 48  | 13.50        | no                 | no               | yes         | 338.00         | 6.00      |                      |                         |
| 101      | Male   | 15.10        | 40  | 12.80        | no                 | no               | yes         | 301.00         | 5.62      |                      |                         |
| 102      | Female | 17.56651323  | 33  | 11.40        | no                 | no               | no          | 37.00          | 0.80      |                      |                         |
| 104      | Female | 20.0774787   | 41  | 10.50        | no                 | no               | yes         | 521.00         | 2.51      |                      |                         |
| 105      | Male   | 16.81666607  | 47  | 8.70         | yes                | no               | yes         | 584.00         | 12.80     |                      | positiva                |
| 106      | Male   | 15.88137212  | 43  | 8.70         | yes                | no               | yes         | 584.00         | 0.73      |                      |                         |
| 107      | Female | 12.30662397  | 21  | 8.70         | yes                | yes              | yes         | 560.00         | 13.30     | positive             | positiva                |
| 108      | Male   | not measured | 41  | 12.30        | yes                | no               | no          | 166.00         | 6.77      |                      |                         |
| 109      | Female | not measured | 36  | 11.40        | yes                | no               | yes         | 230.00         | 10.60     |                      | positiva                |
| 110      | Male   | 20.69012688  | 36  | 9.90         | yes                | yes              | yes         | 606.00         | 2.70      |                      |                         |
| 111      | Male   | 20.2020202   | 43  | 9.30         | yes                | yes              | yes         | 493.00         | 4.36      |                      |                         |
| 112      | Female | 14.09714212  | 17  | 7.90         | yes                | yes              | yes         | 221.00         | 0.96      |                      |                         |
| 114      | Male   | 15.49530772  | 49  | 9.10         | yes                | no               | yes         | 428.00         | 10.00     |                      |                         |
| 115      | Female | not measured | 29  | 11.60        | yes                | no               | no          | 158.00         | 4.97      |                      |                         |
| 116      | Male   | 16.44598618  | 47  | 8.40         | yes                | no               | yes         | 372.80         | 11.50     | positive             | positiva                |
| 117      | Male   | 18.30324564  | 52  | 11.40        | no                 | no               | yes/missing | 46.00          | 6.38      |                      |                         |
| 118      | Male   | 17.92410364  | 51  | 12.30        | yes                | no               | yes/missing | 46.00          | 6.65      |                      |                         |
| 119      | Male   | 18.50191852  | 27  | 6.90         | yes                | yes              | yes         | 399.70         | 2.22      |                      |                         |
| 120      | Male   | 17.17        | 31  | 13.40        | yes                | no               | yes         | 135.00         | 0.64      |                      |                         |
| 121      | Female | 18.7872348   | 35  | 7.10         | no                 | no               | yes         | 592.00         | 1.68      |                      |                         |
| 122      | Male   | 22.49858277  | 20  | 12.40        | no                 | yes              | yes         | 21.00          | 0.08      |                      |                         |
| 123      | Female | 21.82644826  | 46  | 11.40        | no                 | no               | yes/missing | 6.29           | 6.79      |                      |                         |
| 124      | Female | 19.34585419  | 31  | 12.40        | yes                | no               | yes/missing | 4.47           | 0.47      |                      |                         |
| 126      | Male   | 15.93        | 48  | 13.20        | yes                | no               | no          | 123.50         | 8.36      |                      |                         |
| 129      | Male   | 16.27        | 50  | 18.60        | no                 | no               | no          | 506.00         | 1.69      | positive             | positiva                |
| 129      | Male   | 21.268034    | 31  | 10.40        | no                 | no               | yes/missing | 1,007.20       | 13.40     |                      | positiva                |
| 130      | Male   | not measured | 49  | 13.30        | no                 | no               | yes/missing | 4.88           | 4.92      |                      |                         |
| 132      | Male   | 18.2550268   | 48  | 10.80        | no                 | no               | yes         | 95.50          | 4.46      | positive             | positiva                |
| 133      | Male   | 18.8118647   | 47  | 8.90         | yes                | no               | yes         | 996.20         | 4.50      |                      |                         |
| 134      | Male   | 17.64721     | 54  | 11.70        | no                 | no               | no          | 469.00         | 3.60      |                      |                         |
| 136      | Female | 17.0606521   | 39  | 8.20         | no                 | no               | yes/missing | 469.00         | 0.30      |                      |                         |
| 137      | Male   | 17.16292976  | 49  | 9.60         | yes                | no               | yes         | 852.00         | 10.80     |                      |                         |
| 138      | Male   | 14.40613718  | 42  | 10.70        | no                 | no               | yes         | 714.00         | 4.74      |                      |                         |
| 139      | Male   | 16.51245468  | 39  | 11.10        | yes                | yes              | yes         | 1,384.70       | 8.15      |                      |                         |
| 140      | Female | 20.45        | 30  | 13.20        | yes                | yes              | yes         | 596.80         | 4.00      |                      |                         |
| 141      | Female | 16.07897133  | 48  | 11.80        | no                 | no               | yes         | 34.00          | 1.20      |                      |                         |
| 143      | Male   | 17.28029516  | 25  | 11.80        | no                 | no               | yes         | 226.00         | 1.42      |                      |                         |
| 149      | Male   | 17.8925737   | 31  | 8.90         | no                 | no               | no          | 519.00         | 8.06      |                      |                         |
| 152      | Male   | 21.86652321  | 52  | 11.60        | no                 | no               | no/missing  | 8.00           | 8.00      | positive             | positiva                |
| 154      | Male   | 17.14        | 39  | 12.60        | no                 | no               | yes         | 664.00         | 4.32      |                      |                         |
| 155      | Male   | 17.92800454  | 48  | 9.10         | yes                | no               | yes         | 526.00         | 15.20     | positive             | positiva                |
| 156      | Male   | 24.28        | 28  | 12.50        | yes                | no               | no          | 173.00         | 2.42      |                      |                         |
| 157      | Male   | 20.45079588  | 50  | 9.00         | yes                | no               | yes         | 1,467.40       | 2.75      |                      |                         |
| 158      | Male   | 16.18449652  | 53  | 12.00        | yes                | no               | yes         | 212.50         | 4.68      |                      |                         |
| 159      | Male   | not measured | 53  | 11.30        | yes                | no               | yes/missing | 2.00           | 2.48      |                      |                         |
| 160      | Male   | 17.78628138  | 41  | 12.30        | no                 | no               | no/missing  | 3.65           | 3.65      |                      |                         |
| 161      | Male   | 21.81474497  | 44  | 9.50         | yes                | no               | yes/missing | 10.90          | 10.90     |                      |                         |
| 162      | Male   | 17.47672763  | 60  | 9.70         | no                 | no               | yes/missing | 10.90          | 10.90     |                      |                         |
| 163      | Female | 14.27721584  | 44  | 10.10        | no                 | no               | no          | 8.80           | 4.46      |                      |                         |
| 164      | Male   | 17.90005142  | 33  | 12.30        | yes                | yes              | yes         | 172.40         | 0.70      |                      |                         |
| 169      | Male   | not measured | 41  | 11.80        | no                 | no               | no          | 69.80          | 0.08      |                      |                         |
| 173      | Female | 18.0297398   | 31  | 11.80        | yes                | yes              | yes         | 56.50          | 4.03      |                      |                         |
| 174      | Male   | not measured | 30  | 9.80         | no                 | no               | yes         | 817.00         | 6.70      |                      |                         |
| 175      | Male   | 11.94658712  | 53  | 8.90         | yes                | no               | yes         | 453.40         | 10.10     |                      |                         |
| 176      | Female | 16.89090684  | 49  | 11.60        | no                 |                  |             |                |           |                      |                         |
